# Supplementary material for: Spatial imaging of Zn and other elements in Huanglongbing-affected grapefruit by synchrotron-based micro X-ray fluorescence investigation
Source: PubMed Central journal article supplement (PMC3935563; doi:10.1093/jxb/ert450), 2014-01-13

**Spatial imaging of Zn and other elements in Huanglongbing-affected grapefruit by microscopically focused synchrotron X-ray investigation.** Shengke Tian, Lingli Lu, John M. Labavitch, Samuel M. Webb, Xiaoe Yang, Patrick H. Brown, and Zhenli He.

**Supplementary Data**

**Figure S1.** Micro-XRF mapping of elements (Fe, Mn, Cl, S, and P) in the cross-sections of young, mature and old leaves collected from healthy (a) and HLB-affected (b) grapefruit plants. Scale bar: 400  $\mu\text{m}$ .

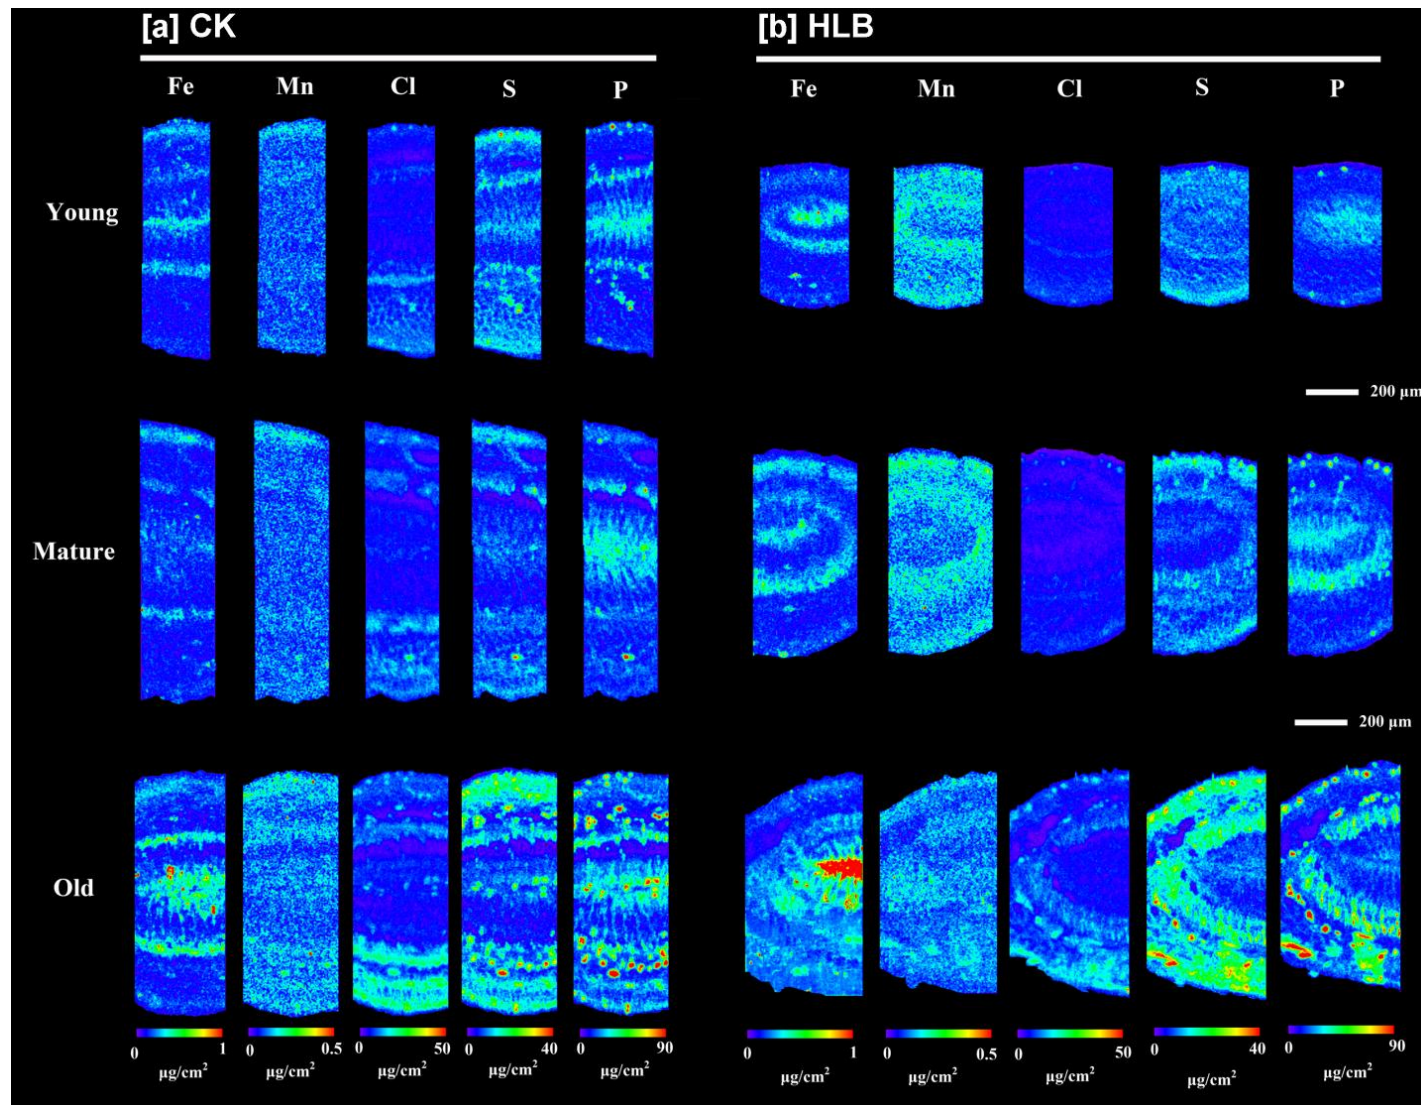

Supplement: supp_ert450_jexbot107581_file001.pdf [file supp_ert450_jexbot107581_file001.pdf]
